# Supplementary material for: Association of rare APOE missense variants with Alzheimer’s disease in the Japanese population
Source: bioRxiv or medRxiv preprint supplement (doi:10.1101/2024.11.05.24316515), 2024-11-06

Supplementary Fig. 2. Pairwise LD measures between two *APOE* RMVs, rs140808909 and rs190853081, determining the *e7* allele.

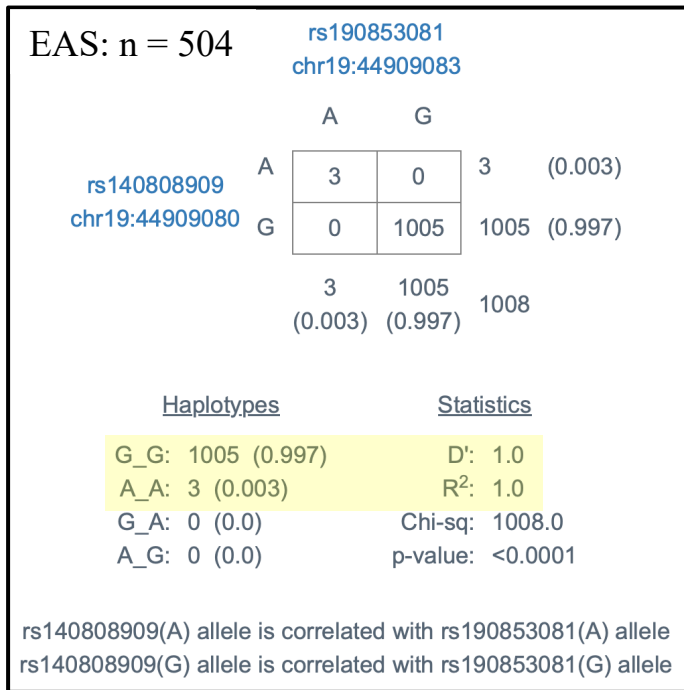

Genome Build (1000G): GRCh38 High Coverage

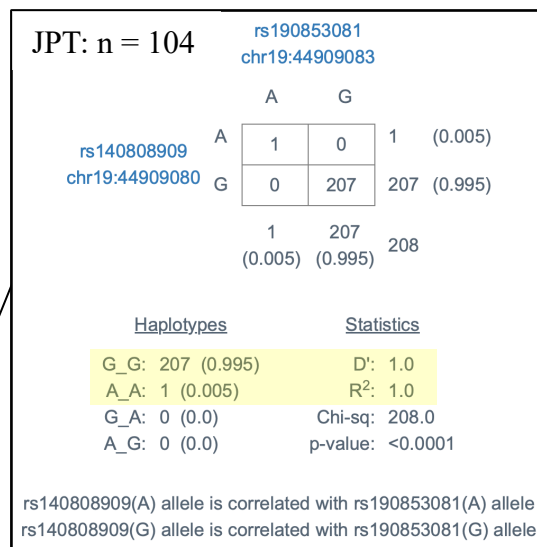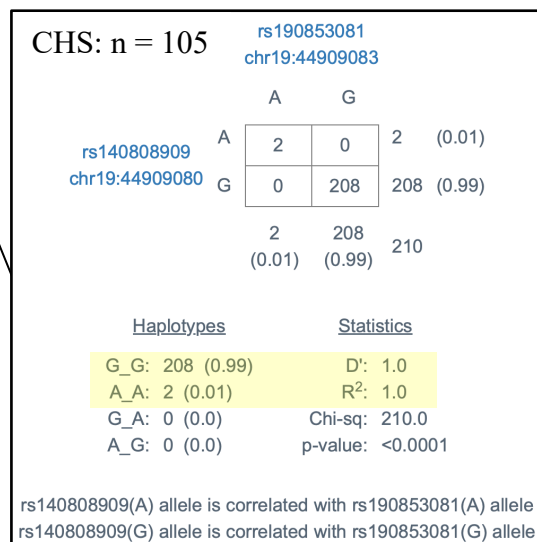

Supplement: Supplementary file [file media-7.pdf]
